# Supplementary material for: Diagnostic accuracy of the partograph alert and action lines to predict adverse birth outcomes: a systematic review
Source: PubMed Central journal article supplement (PMC6899985; doi:10.1111/1471-0528.15884), 2019-08-18
Supplement: BJO-126-1524-s002.pdf [file BJO-126-1524-s002.pdf]

**Table S1.** Characteristics of included studies and study populations

| Country (Author, year)                       | Sample size | Study design    | Data collection                | Setting                                                        | Staff assessing labour progress               | Characteristics of women included                                                                                                                                                                                                                 | Exclusions                                                                                                                                                                                                                                                                                           |
|----------------------------------------------|-------------|-----------------|--------------------------------|----------------------------------------------------------------|-----------------------------------------------|---------------------------------------------------------------------------------------------------------------------------------------------------------------------------------------------------------------------------------------------------|------------------------------------------------------------------------------------------------------------------------------------------------------------------------------------------------------------------------------------------------------------------------------------------------------|
| Senegal (Dujardin, 1992)                     | 1022        | Cross-sectional | Prospective 1990               | 4 peripheral maternity clinics                                 | midwives and CHW                              | All pregnant women presenting to participating facilities.                                                                                                                                                                                        | Partograms were unavailable for 551 (35%) women because of unexpected delivery at home or en route (145), emergency transfer upon admission (12), or expulsion phase or complete dilatation upon admission (394). For the remaining 15 cases, partograms either were not completed or had been lost. |
| Indonesia, Malaysia and Thailand (WHO, 1994) | 6445        | Cluster trial   | 1990-1991                      | 4 pairs of hospitals district general hospitals, urban setting | midwives                                      | Nulliparous (37%) and parous women admitted in active phase, spontaneous or induced labours. Normal group of women defined as those for whom labour complications could not be anticipated                                                        | Preterm less than 34 weeks, cervix dilated 9 or 10 cm, elective caesarean sections, emergency caesarean section within one hour of admission                                                                                                                                                         |
| Iran (Bolbol-Haghighi, 2006)                 | 140         | Cross-sectional | Prospective 2011               | One maternity hospital                                         | midwives                                      | Nulliparous and parous women, uncomplicated pregnancy, spontaneous labour, maximal dilatation of 3 cm upon admission                                                                                                                              |                                                                                                                                                                                                                                                                                                      |
| South Africa (Van Bogaert, 2006)             | 610         | Cross-sectional | Retrospective no year provided | One district hospital                                          | not available                                 | Spontaneous vaginal or instrumental births and emergency caesarean. Parity not specified                                                                                                                                                          |                                                                                                                                                                                                                                                                                                      |
| Ecuador (López, 2008)                        | 500         | Cross-sectional | Prospective 2004-2005          | One hospital                                                   | not available                                 | Nulliparous and parous women, spontaneous labour, admitted between 4 and 9 cm cervical dilatation                                                                                                                                                 | Emergency caesarean section, preterm, stillbirths                                                                                                                                                                                                                                                    |
| Nigeria (Orji, 2008)                         | 463         | Cross-sectional | Prospective 2007               | One University teaching hospital                               | midwives under supervision of an obstetrician | Nulliparous and parous women, uncomplicated, spontaneous labour with cervical dilatation at 4 cm or more.                                                                                                                                         | Premature labor, eclampsia, antepartum hemorrhage, induced labor, or multiple pregnancies                                                                                                                                                                                                            |
| Mali (Diarra 2009)                           | 1522        | Cross-sectional | Retrospective 2005             | One referral hospital                                          | not available                                 | Nulliparous (32%) and parous women, admitted in labour before 8 cm cervical dilatation                                                                                                                                                            | Planned caesarean section, cervical dilatation 8cm or more                                                                                                                                                                                                                                           |
| Brazil (Rocha 2009)                          | 233         | Cross-sectional | Retrospective 2004-2005        | One maternity hospital (Normal Childbirth Center)              | midwives                                      | Nulliparous (40%) and parous women, spontaneous labour, childbirth occurred at least two hours after admission, alert and action lines marked on the partogram; partogram marked correctly according to the model proposed by the Health Ministry |                                                                                                                                                                                                                                                                                                      |

|                                   |      |                                          |                       |                                                          |                                                                                 |                                                                                                                                                                |                                                                                                                                                                                                                                                                                                                                                                  |
|-----------------------------------|------|------------------------------------------|-----------------------|----------------------------------------------------------|---------------------------------------------------------------------------------|----------------------------------------------------------------------------------------------------------------------------------------------------------------|------------------------------------------------------------------------------------------------------------------------------------------------------------------------------------------------------------------------------------------------------------------------------------------------------------------------------------------------------------------|
| India (Shinde, 2012)              | 100  | Cross-sectional, randomly selected cases | Prospective 2009-2011 | One eaching tertiary hospital                            |                                                                                 | Nulliparous and parous women, presenting to labour room                                                                                                        | Women with anemia, hypertension, diabetes and immune compromised status, preterm labour, previous LSCS, postdatism, multiple pregnancies, antepartum hemorrhage (APH), intrauterine growth restriction, (IUGR), premature rupture of membranes, (PROM), intrauterine fetal death (IUFD)                                                                          |
| India (Sanyal, 2014)              | 500  | Cross-sectional                          | Prospective 2011-2012 | One teaching hospital                                    | Cases showing abnormal course of labour were reevaluated by senior obstetrician | Nulliparous, uncomplicated pregnancy                                                                                                                           | Non vertex presenting part, known major fetal structural anomalies, previous uterine surgery, antepartum hemorrhage, premature rupture of membranes, intrauterine growth retardation, intra uterine fetal death, anemia, hypertension, diabetes, immunocompromised state                                                                                         |
| India (Rani, 2016)                | 200  | Cross-sectional                          | Prospective 2011-2013 | One maternity hospital                                   | not available                                                                   | Nulliparous and parous women, uncomplicated, spontaneous labour                                                                                                | PPH, oligohydramnios, anemia, heart disease, diabetes, teenage pregnancy, hypertensive disorder of pregnancy, renal disease, macrosomia, polyhydramnois, IUGR, placenta previa for vaginal delivery (type I and type II anterior), liver disease, malpresentation breech, multiple pregnancy, preterm labour, scarred uterus, accidental haemorrhage, HIV /HBsAg |
| India (Shah, 2016)                | 247  | Cross-sectional                          | Prospective 2012-2013 | One general hospital                                     | not available                                                                   | Nulliparous and parous women, uncomplicated pregnancy, spontaneous labour, from 4cm dilatation                                                                 | History of medical, surgical, or obstetric problems, history of taking analgesic drugs during pregnancy, and congenital fetal problems                                                                                                                                                                                                                           |
| Nigeria and Uganda (Souza, 2018)* | 8489 | Prospective Cohort                       | Prospective 2014-2015 | 13 hospitals with a minimum of 1,000 deliveries per year | Midwives, obstetricians or obstetric residents                                  | Nulliparous (41%) and parous women, with spontaneous onset of labour presenting at cervical dilatation of $\leq 6$ cm and those undergoing induction of labour |                                                                                                                                                                                                                                                                                                                                                                  |

\*Characteristics of the population presented for the total sample of 9995 women

**Table S1.** Continued

| Country (Author, year)                       | Fetal characteristics                                                                                                          | Caesarean section %                                 | Artificial rupture of membranes % | Oxytocin augmentation % | Other labour characteristics                                         | Protocols in place                                                                                                       | Start point for plotting cervicograph/ lag time of action line | Comments                                                                                                                                                                                                                                                                                                                                           |
|----------------------------------------------|--------------------------------------------------------------------------------------------------------------------------------|-----------------------------------------------------|-----------------------------------|-------------------------|----------------------------------------------------------------------|--------------------------------------------------------------------------------------------------------------------------|----------------------------------------------------------------|----------------------------------------------------------------------------------------------------------------------------------------------------------------------------------------------------------------------------------------------------------------------------------------------------------------------------------------------------|
| Senegal (Dujardin, 1992)                     | NA                                                                                                                             | Not applicable                                      | –                                 | –                       | –                                                                    |                                                                                                                          | 3cm/3h                                                         | Do not identify intra-uterine deaths at admission                                                                                                                                                                                                                                                                                                  |
| Indonesia, Malaysia and Thailand (WHO, 1994) | Singleton and multiple pregnancies, over 34 weeks of gestation, all fetal presentations (89% spontaneous vertex vaginal birth) | 2.7%                                                | All women in active phase         | 7.6%                    | –                                                                    | All facilities practising active management of labour. Protocol included rupture of membranes in active phase of labour. | 3cm/4h                                                         | Includes augmentation with oxytocin, spontaneous or operative vaginal birth and caesarean sections. Reported also relevant outcomes on women admitted in latent phase. Separates intra-uterine deaths at admission and those occurring after admission                                                                                             |
| Iran (Bolbol-Haghighi, 2006)                 | Live fetus, singleton, at term, cephalic presentation<br>39.7 ± 6.92 weeks                                                     | –                                                   | –                                 | 15%                     | –                                                                    |                                                                                                                          | 3cm/4h                                                         | –                                                                                                                                                                                                                                                                                                                                                  |
| South Africa (Van Bogaert, 2006)             | NA                                                                                                                             | 60% CS, 223 for prolonged labour, 90 fetal distress | –                                 | –                       | –                                                                    |                                                                                                                          | 3cm/4h                                                         | Resuscitation determined by an Apgar score at 1 min of less than 7.<br>Reported also 18 early neonatal deaths (10 left to the alert line, 8 right to the alert line)<br>The spontaneous vaginal deliveries were selected to match the distribution of the emergency CS in terms of speed of cervical dilatation on the partogram                   |
| Ecuador (López, 2008)                        | Live fetus, term (38-41 weeks), cephalic presentation<br>Mean GA 39,4 ± 1,03                                                   | –                                                   | –                                 | –                       | –                                                                    |                                                                                                                          | 4cm/4h                                                         | –                                                                                                                                                                                                                                                                                                                                                  |
| Nigeria (Orji, 2008)                         | Singleton pregnancy, at term<br>Mean birth weight:3250 grams, Mean GA: 39                                                      | 24%                                                 | –                                 | 36%                     | –                                                                    |                                                                                                                          | 4cm/4h                                                         | Includes augmentation with oxytocin, spontaneous or operative vaginal birth and caesarean sections. The 5 fresh stillbirths occurred in nulliparas whose labor was augmented because of a delay in labor progress. Tight coiling of the umbilical cord around the neck caused the fetal death in each case.                                        |
| Mali (Diarra 2009)                           | 88.5% with fundal height between 32-36 cm, 90% cephalic presentation                                                           | 35%                                                 | –                                 | –                       | –                                                                    |                                                                                                                          | 4cm/4h                                                         | Additional information in Camara 2007 ( <a href="http://www.keneya.net/fmpos/theses/2007/med/pdf/07M235.pdf">http://www.keneya.net/fmpos/theses/2007/med/pdf/07M235.pdf</a> ): five maternal deaths and 6 uterine rupture but no information by group. Apgar score reported is at first minute. Reported 57 neonatal deaths and 5 maternal deaths. |
| Brazil (Rocha 2009)                          | Live fetus, singleton, at term, cephalic presentation                                                                          | 7%                                                  | 53%                               | 46%                     | 79% with uterine contractions, 69% intact membranes, 10% previous CS |                                                                                                                          | 4cm/4h (WHO Modified partograph)                               | Resuscitation defined as artificial ventilation, heart massage and drug use. Not timing or indications for resuscitation provided.<br>No neonatal deaths reported in the study population<br>233 women meeting the inclusion criteria out of 499 births during study period                                                                        |

|                                   |                                                                                              |                                           |     |     |                                                                                                                       |                                   |                                                                                                                                                                                                                                                                                                                                                                                                                                                                                                                                                                                                                                                                                                                                                                                                 |
|-----------------------------------|----------------------------------------------------------------------------------------------|-------------------------------------------|-----|-----|-----------------------------------------------------------------------------------------------------------------------|-----------------------------------|-------------------------------------------------------------------------------------------------------------------------------------------------------------------------------------------------------------------------------------------------------------------------------------------------------------------------------------------------------------------------------------------------------------------------------------------------------------------------------------------------------------------------------------------------------------------------------------------------------------------------------------------------------------------------------------------------------------------------------------------------------------------------------------------------|
| India (Shinde, 2012)              | Live fetus, singleton, at term (37-40 weeks), cephalic presentation                          | -                                         | -   | -   | -                                                                                                                     | 4cm/4h (WHO Modified partograph)  | 50 nulliparous women and 50 parous women randomly selected during a two years period. All women were given water enema. One neonatal death due to severe birth asphyxia.                                                                                                                                                                                                                                                                                                                                                                                                                                                                                                                                                                                                                        |
| India (Sanyal, 2014)              | Live fetus, singleton, at term, cephalic presentation<br>85% between 38-40 weeks             | 16%                                       | 17% | 18% | -                                                                                                                     | 4cm/4h (WHO Modified partograph)  | Reported on maternal outcomes not included in this review (PPH, fever, puerperal infection, blood transfusion, wound complication), and admission to NICU<br>No fresh stillbirths or maternal deaths observed<br>Early neonatal mortality was due to neonatal sepsis and meconium aspiration                                                                                                                                                                                                                                                                                                                                                                                                                                                                                                    |
| India (Rani, 2016)                | Singleton pregnancy, at term (37-42), cephalic presentation<br>49% 2501-3000 grams           | 15%                                       | -   | -   | -                                                                                                                     | Not specified, probably at 3cm/4h | -                                                                                                                                                                                                                                                                                                                                                                                                                                                                                                                                                                                                                                                                                                                                                                                               |
| India (Shah, 2016)                | Live fetus, singleton, at term, cephalic presentation                                        | 17%<br>primigravidae, 3%<br>multigravidae | -   | -   | -                                                                                                                     | 4cm/4h (WHO Modified partograph)  | Neonatal asphyxia defined as Apgar score of <7 at 0,1,5 min<br>The labour protocol carried out was as follows: Per vaginal examinations were carried out on admission, and at 4 hourly intervals or more frequently if needed. Maternal and fetal parameters were plotted on the modified WHO partograph in active labour. When the progress appeared normal on partograph no intervention was made. When the plot crossed the alert line the patient was immediately reassessed. Oxytocin augmentation was considered when the alert line was crossed or at 6 hours after admission if the uterine contractions were inadequate (defined as contractions of <4 per 10 min lasting for <40 sec). When the plot crossed action line immediate intervention in form of caesarean section was done |
| Nigeria and Uganda (Souza, 2018)* | Live fetus, singleton, at near-term or term (34 weeks or more)<br>98.6 cephalic presentation | 13%                                       | -   | 35% | 90% spontaneous labour, 12% pre-labour complications during pregnancy, 2% pharmacological analgesia, 5.4% previous CS | 4cm/4h (WHO Modified partograph)  | Women who were unwilling to participate or incapable of giving consent due to obstetric emergencies were excluded<br>Analysis included women with at least two assessments of cervical dilatation                                                                                                                                                                                                                                                                                                                                                                                                                                                                                                                                                                                               |
