# Supplementary material for: Diagnostic accuracy of the partograph alert and action lines to predict adverse birth outcomes: a systematic review
Source: PubMed Central journal article supplement (PMC6899985; doi:10.1111/1471-0528.15884), 2019-08-18
Supplement: BJO-126-1524-s003.pdf [file BJO-126-1524-s003.pdf]

**Table S2.** Suggested interpretation of diagnostic accuracy statistics

| Interpretation     | Positive Likelihood Ratio | Negative Likelihood Ratio | Diagnostic Odds Ratio | J statistic [Youden's Index] |
|--------------------|---------------------------|---------------------------|-----------------------|------------------------------|
| Non-discrimination | 1.00                      | 1.00                      | 1.00                  | 0.00                         |
| Poor               | 1.01-1.50                 | 0.99-0.67                 | 1.01-2.25             | 0.01-0.20                    |
| Intermediate       | 1.51-9.99                 | 0.66-0.11                 | 2.26-99.99            | 0.21-0.79                    |
| Excellent          | $\geq 10.00$              | $\leq 0.10$               | $\geq 100.00$         | $\geq 0.80$                  |
