# Supplementary material for: Diagnostic accuracy of the partograph alert and action lines to predict adverse birth outcomes: a systematic review
Source: PubMed Central journal article supplement (PMC6899985; doi:10.1111/1471-0528.15884), 2019-08-18
Supplement: BJO-126-1524-s004.pdf [file BJO-126-1524-s004.pdf]

**Table S3.** Diagnostic test accuracy of the alert line for adverse neonatal outcomes

| Country (Year) <sup>reference</sup>                    | Alert line status | Adverse Neonatal Outcome* |        | Percentage of alert line crossing | Prevalence of adverse neonatal outcome | Sensitivity (95% CI) | Specificity (95% CI) | Positive Likelihood Ratio (95% CI) | Negative likelihood ratio (95% CI) | Diagnostic Odds Ratio (95% CI) | J statistic (95% CI) |
|--------------------------------------------------------|-------------------|---------------------------|--------|-----------------------------------|----------------------------------------|----------------------|----------------------|------------------------------------|------------------------------------|--------------------------------|----------------------|
|                                                        |                   | Present                   | Absent |                                   |                                        |                      |                      |                                    |                                    |                                |                      |
| <b>Apgar Score at 1 min &lt;7</b>                      |                   |                           |        |                                   |                                        |                      |                      |                                    |                                    |                                |                      |
| Indonesia, Malaysia and Thailand (1994) <sup>WHO</sup> | Crossed           | 209                       | 1323   | 23.8%                             | 6.0%                                   | 32.0%                | 26.7%                | 2.5                                | 0.6                                | 4.3                            | 32.6%                |
|                                                        | Not crossed       | 175                       | 4735   |                                   |                                        | (49.4-59.3)          | (77.1-79.2)          | (2.3-2.8)                          | (0.5-0.7)                          | (3.5-5.3)                      | (27.5-37.7)          |
| Mali (2009) <sup>Diarra**</sup>                        | Crossed           | 107                       | 441    | 36.0%                             | 9.6%                                   | 73.3%                | 68.0%                | 2.3                                | 0.4                                | 5.8                            | 41.2%                |
|                                                        | Not crossed       | 39                        | 935    |                                   |                                        | (65.6-79.8)          | (65.4-70.4)          | (2.0-2.6)                          | (0.3-0.5)                          | (4.0-8.5)                      | (33.6-48.8)          |
| India(2014) <sup>Sanyal</sup>                          | Crossed           | 63                        | 33     | 19.2%                             | 26.0%                                  | 48.5%                | 91.1%                | 5.4                                | 0.6                                | 9.6                            | 39.5%                |
|                                                        | Not crossed       | 67                        | 337    |                                   |                                        | (40.0-57.0)          | (87.7-93.6)          | (3.8-7.9)                          | (0.5-0.7)                          | (5.9-15.8)                     | (30.5-48.6)          |
| Iran (2006) <sup>Bolbol-Haghighi</sup>                 | Crossed           | 10                        | 30     | 29.4%                             | 9.6%                                   | 76.9%                | 75.6%                | 3.2                                | 0.3                                | 10.3                           | 52.5%                |
|                                                        | Not crossed       | 3                         | 93     |                                   |                                        | (49.7-91.8)          | (67.3-82.4)          | (2.1-4.9)                          | (0.1-0.8)                          | (2.7- 40.0)                    | (28.4-76.7)          |
| Overall***                                             | Crossed           | 180                       | 504    | 31.7%                             | 13.4%                                  | 34.8%                | 82.8%                | 2.0                                | 0.8                                | 2.6                            | 17.6%                |
|                                                        | Not crossed       | 109                       | 1365   |                                   |                                        | (32.5-37.1)          | (81.7-83.9)          | (1.9-2.2)                          | (0.7-0.8)                          | (2.7-2.9)                      | (15-20.1)            |
| <b>Apgar Score at 5min &lt;7</b>                       |                   |                           |        |                                   |                                        |                      |                      |                                    |                                    |                                |                      |
| South Africa (2006) <sup>Van Bogaert</sup>             | Crossed           | 28                        | 433    | 75.9%                             | 7.6%                                   | 60.9%                | 22.8%                | 0.79                               | 1.72                               | 0.46                           | -16.3%               |
|                                                        | Not crossed       | 18                        | 128    |                                   |                                        | (46.5-73.6)          | (19.5-26.5)          | (0.6-1.0)                          | (1.2-2.5)                          | (0.3-0.9)                      | (-30.8-(-1.8))       |
| Ecuador (2008) <sup>López</sup>                        | Crossed           | 3                         | 289    | 58.4%                             | 0.6%                                   | 100.0%               | 41.9%                | 1.72                               | NA                                 | NA                             |                      |
|                                                        | Not crossed       | 0                         | 208    |                                   |                                        | (43.9-100)           | (37.6-46.2)          | (1.6-1.9)                          |                                    |                                |                      |
| Brazil (2009) <sup>Rocha</sup>                         | Crossed           | 2                         | 98     | 42.9%                             | 1.3%                                   | 66.7%                | 57.4%                | 1.56                               | 0.58                               | 2.69                           | 24.1%                |
|                                                        | Not crossed       | 1                         | 132    |                                   |                                        | (20.8-93.6)          | (50.9-63.6)          | (0.7-3.5)                          | (0.1-2.9)                          | (0.2-30.1)                     | (-29.6-77.8)         |
| India(2014) <sup>Sanyal</sup>                          | Crossed           | 43                        | 53     | 19.2%                             | 17.2%                                  | 50.0%                | 87.2%                | 3.91                               | 0.57                               | 6.81                           | 37.20%               |
|                                                        | Not crossed       | 43                        | 361    |                                   |                                        | (39.7-60.3)          | (83.6-90.0)          | (2.8-5.4)                          | (0.5-0.7)                          | (4.1-11.4)                     | (26.2-48.2%)         |
| India (2016) <sup>Rani</sup>                           | Crossed           | 4                         | 109    | 56.5%                             | 2.0%                                   | 100.0%               | 44.4%                | 1.80                               | NA                                 | NA                             | 44.4%                |
|                                                        | Not crossed       | 0                         | 87     |                                   |                                        | (51.0- 100)          | (37.6-51.4)          | (1.6-2.0)                          |                                    |                                | (37.4-51.3)          |
| Nigeria and Uganda (2018) <sup>Souza</sup>             | Crossed           | 143                       | 3990   | 49.0%                             | 2.8%                                   | 60.9%                | 51.4%                | 1.25                               | 0.76                               | 1.64                           | 12.2%                |
|                                                        | Not crossed       | 92                        | 4215   |                                   |                                        | (54.5-66.9)          | (50.3-52.5)          | (1.1-1.4)                          | (0.7-0.9)                          | (1.3-2.1)                      | (5.9-18.6)           |
| Overall                                                | Crossed           | 223                       | 4972   | 49.6%                             | 3.6%                                   | 59.2%                | 50.8%                | 1.20                               | 0.80                               | 1.49                           | 9.9%                 |
|                                                        | Not crossed       | 154                       | 5131   |                                   |                                        | (54.1-64.0)          | (49.8-51.8)          | (1.1- 1.3)                         | (0.7- 0.9)                         | (1.2- 1.8)                     | (4.9-15.0)           |
| <b>Neonatal resuscitation****</b>                      |                   |                           |        |                                   |                                        |                      |                      |                                    |                                    |                                |                      |
| Senegal (1992) <sup>Dujardin</sup>                     | Crossed           | 14                        | 67     | 8.4%                              | 5.4%                                   | 26.9%                | 92.6%                | 3.7                                | 0.8                                | 4.6                            | 0.2%                 |
|                                                        | Not crossed       | 38                        | 842    |                                   |                                        | (16.8-40.3)          | (90.8-94.2)          | (2.2-6.0)                          | (0.7-0.9)                          | (2.4-9.0)                      | (7.4-31-7)           |

|                                                  |             |    |      |       |       |             |             |            |           |            |                |
|--------------------------------------------------|-------------|----|------|-------|-------|-------------|-------------|------------|-----------|------------|----------------|
| South Africa (2006) <sup>Van Bogaert</sup>       | Crossed     | 82 | 379  | 75.9% | 21.9% | 61.7%       | 20.0%       | 0.8        | 1.9       | 0.4        | -0.2%          |
|                                                  | Not crossed | 51 | 95   |       |       | (53.2-69.5) | (16.7-23.9) | (0.7-0.9)  | (1.5-2.5) | (0.3-0.6)  | (-27.3-(-9.3)) |
| Brazil (2009) <sup>Rocha</sup>                   | Crossed     | 4  | 96   | 42.9% | 2.6%  | 66.7%       | 57.7%       | 1.6        | 0.6       | 2.7        | 0.2%           |
|                                                  | Not crossed | 2  | 131  |       |       | (30.0-90.3) | (51.2-64.0) | (0.9-2.8)  | (0.2-1.8) | (0.5-15.2) | (-13.9-62.6)   |
| Nigeria and Uganda (2018) <sup>Souza</sup>       | Crossed     | 34 | 4099 | 49.0% | 0.7%  | 54.0%       | 51.1%       | 1.1        | 0.9       | 1.2        | 0.1%           |
|                                                  | Not crossed | 29 | 4278 |       |       | (41.8-65.7) | (50.0-52.1) | (0.9-1.4)  | (0.7-1.2) | (0.7-2.0)  | (-7.3-17.4)    |
| <b>Birth asphyxia</b>                            |             |    |      |       |       |             |             |            |           |            |                |
| Nigeria (2008) <sup>Orji 2008</sup>              | Crossed     | 22 | 186  | 45.4% | 10.3% | 46.8%       | 54.7%       | 1.0        | 1.0       | 1.1        | 0              |
|                                                  | Not crossed | 25 | 225  |       |       | (33.3-60.8) | (49.9-59.5) | (0.8-1.4)  | (0.7-1.3) | (0.6-2.0)  | (-13.5-16.6)   |
| India (2016) <sup>Rani</sup>                     | Crossed     | 7  | 106  | 56.5% | 4.5%  | 77.8%       | 44.5%       | 1.4        | 0.5       | 2.8        | 0.2%           |
|                                                  | Not crossed | 2  | 85   |       |       | (45.3-93.7) | (37.6-51.6) | (0.97-2.0) | (0.2-1.7) | (0.6-13.9) | (-5.8-50.3)    |
| India (2016) <sup>Shah</sup>                     | Crossed     | 7  | 79   | 32.8% | 5.7%  | 46.7%       | 68.0%       | 1.5        | 0.8       | 1.9        | 0.1%           |
|                                                  | Not crossed | 8  | 168  |       |       | (24.8-69.9) | (62.0-73.5) | (0.8-2.6)  | (0.5-1.3) | (0.7-5.3)  | (-11.2-40.6)   |
| Overall                                          | Crossed     | 29 | 292  | 48.8% | 8.5%  | 51.8%       | 51.5%       | 1.1        | 0.9       | 1.1        | 0              |
|                                                  | Not crossed | 27 | 310  |       |       | (39.0-64.3) | (47.5-55.5) | (0.8-1.4)  | (0.7-1.2) | (0.7-2.0)  | (-10.4-17.0)   |
| <b>Early neonatal mortality</b>                  |             |    |      |       |       |             |             |            |           |            |                |
| South Africa (2006) <sup>***** Van Bogaert</sup> | Crossed     | 8  | 453  | 75.9% | 3.0%  | 44.4%       | 23.1%       | 0.6        | 2.4       | 0.2        | -0.3%          |
|                                                  | Not crossed | 10 | 136  |       |       | (24.6-66.3) | (19.9-26.7) | (0.3-0.97) | (1.6-3.7) | (0.1-0.6)  | (-55.7-(-9.3)) |

NA: not applicable

\* Stillbirths and unknown outcomes excluded from the denominator as follows; Dujardin 1992: outcome unknown for 33 neonates and 28 stillbirths excluded; WHO 1994: 3 stillbirths excluded; Van Bogaert 2006: 3 stillbirths excluded Orji 2008: 5 stillbirths excluded; Souza 2018: 49 stillbirths excluded)

\*\*According to data published in full thesis at: <http://www.kenya.net/fmpos/theses/2007/med/pdf/07M235.pdf>, and confirmed by the authors.

\*\*\*WHO 1994 excluded as reported Apgar Score at 1 min <8

\*\*\*\*Resuscitation definitions vary between studies and results were not pooled. VanBogaert: Resuscitation determined by an Apgar score at 1 min of less than 7; Rocha: artificial ventilation, heart massage, drug use, timing not specified

\*\*\*\*\* Deaths resulted from low Apgar scores and unsuccessful resuscitation
