# Supplementary material for: Diagnostic accuracy of the partograph alert and action lines to predict adverse birth outcomes: a systematic review
Source: PubMed Central journal article supplement (PMC6899985; doi:10.1111/1471-0528.15884), 2019-08-18
Supplement: BJO-126-1524-s005.pdf [file BJO-126-1524-s005.pdf]

**Table S4.** Diagnostic test accuracy of the action line for adverse fetal outcomes

| Country<br>(Year) reference                       | Action line<br>status | Adverse Fetal<br>Outcome |        | Percentage<br>of action<br>line crossing | Prevalence<br>of adverse<br>fetal<br>outcomes | Sensitivity<br>(95% CI) | Specificity<br>(95% CI) | Positive<br>likelihood<br>ratio<br>(95% CI) | Negative<br>likelihood<br>ratio<br>(95% CI) | Diagnostic<br>Odds Ratio<br>(95% CI) | J statistic<br>(95% CI) |
|---------------------------------------------------|-----------------------|--------------------------|--------|------------------------------------------|-----------------------------------------------|-------------------------|-------------------------|---------------------------------------------|---------------------------------------------|--------------------------------------|-------------------------|
|                                                   |                       | Present                  | Absent |                                          |                                               |                         |                         |                                             |                                             |                                      |                         |
| Senegal (1992)<br>Dujardin                        | Crossed*              | 3                        | 28     | 3.1%                                     | 1.4%                                          | 21.4%                   | 97.2%                   | 7.55                                        | 0.81                                        | 9.33                                 | 18.6%                   |
|                                                   | Not crossed**         | 11                       | 958    |                                          |                                               | (7.6-47.6)              | (95.9-98.0)             | (2.6-21.9)                                  | (0.6-1.1)                                   | (2.5-35.3)                           | (-2.9-40.1)             |
| Indonesia, Malaysia<br>and Thailand (1994)<br>WHO | Crossed               | 0                        | 521    | 8.1%                                     | 0.0%                                          | 0.0%                    | 91.9%                   | NA                                          | 1.09                                        | NA                                   | -8.1%                   |
|                                                   | Not crossed           | 3                        | 5921   |                                          |                                               | (0-56.15)               | (91.2-93.0)             |                                             | (1.1-1.1)                                   |                                      | (-0.1-(-0.07))          |
| Nigeria (2008) <sup>Orji</sup>                    | Crossed               | 0                        | 102    | 22.0%                                    | 1.1%                                          | 0                       | 0.8                     | NA                                          | 1.3                                         | NA                                   | -22.3%                  |
|                                                   | Not crossed           | 5                        | 356    |                                          |                                               | (0-43.5)                | (73.7-81.3)             |                                             | (1.2-1.4)                                   |                                      | (-0.3-(-0.2))           |
| Nigeria and Uganda<br>(2018) <sup>Souza</sup>     | Crossed               | 9                        | 1259   | 14.9%                                    | 0.6%                                          | 18.4%                   | 85.1%                   | 1.23                                        | 0.96                                        | 1.28                                 | 3.5%                    |
|                                                   | Not crossed           | 40                       | 7181   |                                          |                                               | (10.0-31.4)             | (84.3-85.8)             | (0.7-2.2)                                   | (0.8-1.1)                                   | (0.6- 2.7)                           | (-0.1-0.1)              |

NA not applicable; \*outcome unknown for 4 women and 0 macerated stillbirths excluded from the denominator; \*\*outcome unknown for 4 women and 14 macerated stillbirths excluded from the denominator.
