# Supplementary material for: Diagnostic accuracy of the partograph alert and action lines to predict adverse birth outcomes: a systematic review
Source: PubMed Central journal article supplement (PMC6899985; doi:10.1111/1471-0528.15884), 2019-08-18
Supplement: BJO-126-1524-s006.pdf [file BJO-126-1524-s006.pdf]

**Table S5.** Diagnostic test accuracy of the action line for adverse neonatal outcomes

| Country<br>(Year) reference                                                                       | Action line<br>status | Adverse Neonatal<br>Outcome |        | Percentage<br>of action<br>line<br>crossing | Prevalence<br>of adverse<br>neonatal<br>outcome | Sensitivity<br>(95% CI) | Specificity<br>(95% CI) | Positive<br>likelihood<br>ratio<br>(95% CI) | Negative<br>likelihood<br>ratio<br>(95% CI) | Diagnostic<br>Odds Ratio<br>(95% CI) | J statistic<br>(95% CI) |
|---------------------------------------------------------------------------------------------------|-----------------------|-----------------------------|--------|---------------------------------------------|-------------------------------------------------|-------------------------|-------------------------|---------------------------------------------|---------------------------------------------|--------------------------------------|-------------------------|
|                                                                                                   |                       | Present                     | Absent |                                             |                                                 |                         |                         |                                             |                                             |                                      |                         |
| <b>Apgar Score at 1 min &lt;7</b>                                                                 |                       |                             |        |                                             |                                                 |                         |                         |                                             |                                             |                                      |                         |
| Indonesia, Malaysia<br>and Thailand (1994)<br><sup>WHO</sup> [Apgar Score at 1 min<br><8]         | Crossed               | 98                          | 423    | 8.1%                                        | 6.0%                                            | 25.5%                   | 93.0%                   | 3.65                                        | 0.80                                        | 4.56                                 | 18.5%                   |
|                                                                                                   | Not crossed*          | 286                         | 5635   |                                             |                                                 | (21.4-30.1)             | (92.4-93.6)             | (3.0-4.4)                                   | (0.8-0.9)                                   | (3.6-5.9)                            | (14.1-22.9)             |
| Mali (2009) <sup>Diarra**</sup>                                                                   | Crossed               | 62                          | 10     | 4.7%                                        | 9.6%                                            | 42.5%                   | 99.3%                   | 58.43                                       | 0.58                                        | 100.82                               | 41.7%                   |
|                                                                                                   | Not crossed           | 84                          | 1366   |                                             |                                                 | (34.7-50.6)             | (98.7-99.6)             | (30.6-111.5)                                | (0.5-0.7)                                   | (49.9-203.7)                         | (33.7-49.8)             |
| <b>Apgar Score at 5min &lt;7</b>                                                                  |                       |                             |        |                                             |                                                 |                         |                         |                                             |                                             |                                      |                         |
| Ecuador (2008) <sup>López</sup>                                                                   | Crossed               | 0                           | 64     | 12.8%                                       | 0.0%                                            | NA                      | NA                      | NA                                          | NA                                          | NA                                   | NA                      |
|                                                                                                   | Not crossed           | 0                           | 436    |                                             |                                                 |                         |                         |                                             |                                             |                                      |                         |
| Brazil (2009) <sup>Rocha</sup>                                                                    | Crossed               | 0                           | 21     | 9.0%                                        | 1.3%                                            | 0.0%                    | 90.9%                   | NA                                          | 1.10                                        | NA                                   | -9.1%                   |
|                                                                                                   | Not crossed           | 3                           | 209    |                                             |                                                 | (0-56.2)                | (86.5-94.0)             |                                             | (1.1-1.2)                                   |                                      | (-12.9-(-5.4))          |
| India (2016) <sup>Rani</sup>                                                                      | Crossed               | 0                           | 32     | 16.0%                                       | 2.0%                                            | 0.0%                    | 83.7%                   | NA                                          | 1.20                                        | NA                                   | -16.3%                  |
|                                                                                                   | Not crossed           | 4                           | 164    |                                             |                                                 | (0-49.0)                | (77.9-88.2)             |                                             | (1.2-1.3)                                   |                                      | (-21.5-(-11.2))         |
| Nigeria and Uganda<br>(2018) <sup>Souza</sup>                                                     | Crossed               | 51                          | 1217   | 14.9%                                       | 2.8%                                            | 21.7%                   | 85.3%                   | 1.47                                        | 0.92                                        | 1.60                                 | 7.0%                    |
|                                                                                                   | Not crossed           | 184                         | 7037   |                                             |                                                 | (16.9-27.4)             | (84.5-86.0)             | (1.2-1.9)                                   | (0.9-0.98)                                  | (1.17-2.20)                          | (1.6-12.3)              |
| <b>Neonatal resuscitation****</b>                                                                 |                       |                             |        |                                             |                                                 |                         |                         |                                             |                                             |                                      |                         |
| Senegal (1992) <sup>Dujardin</sup><br>[Neonatal resuscitation at<br>birth]                        | Crossed               | 4                           | 19     | 2.4%                                        | 5.4%                                            | 7.7%                    | 97.9%                   | 3.68                                        | 0.94                                        | 3.90                                 | 5.6%                    |
|                                                                                                   | Not crossed           | 48                          | 890    |                                             |                                                 | (3.0-18.2)              | (96.898.7)              | (1.3-10.4)                                  | (0.87-1.02)                                 | (1.3-11.9)                           | (-1.7-12.9)             |
| Brazil (2009) <sup>Rocha</sup><br>[Neonatal resuscitation]                                        | Crossed               | 0                           | 21     | 9.0%                                        | 2.6%                                            | 0.0%                    | 90.7%                   | NA                                          | 1.10                                        | NA                                   | -9.3%                   |
|                                                                                                   | Not crossed           | 6                           | 206    |                                             |                                                 | (0-39.0)                | (86.3-93.9)             |                                             | (1.06-1.15)                                 |                                      | (-13.0-(-5.5))          |
| Nigeria and Uganda<br>(2018) <sup>Souza</sup><br>[Neonatal resuscitation<br>during hospital stay] | Crossed               | 14                          | 1254   | 14.9%                                       | 0.7%                                            | 22.2%                   | 85.1%                   | 1.49                                        | 0.91                                        | 1.63                                 | 7.3%                    |
|                                                                                                   | Not crossed           | 49                          | 7172   |                                             |                                                 | (13.7-33.9)             | (84.3-85.9)             | (0.9-2.4)                                   | (0.8-1.0)                                   | (0.9-3.0)                            | (-3.0-17.6)             |
| <b>Birth asphyxia</b>                                                                             |                       |                             |        |                                             |                                                 |                         |                         |                                             |                                             |                                      |                         |
| Nigeria (2008) <sup>Orji</sup>                                                                    | Crossed               | 13                          | 89     | 22.0%                                       | 10.2%                                           | 27.7%                   | 78.6%                   | 1.29                                        | 0.92                                        | 1.40                                 | 6.3%                    |
|                                                                                                   | Not crossed           | 34                          | 327    |                                             |                                                 | (16.9-41.8)             | (74.4-82.3)             | (0.79-2.13)                                 | (0.77-1.11)                                 | (0.71-2.8)                           | (-7.1-19.6)             |
| India (2016) <sup>Shah</sup>                                                                      | Crossed               | 1                           | 8      | 3.5%                                        | 5.0%                                            | 7.7%                    | 96.7%                   | 2.37                                        | 0.95                                        | 2.48                                 | 4.4%                    |
|                                                                                                   | Not crossed           | 12                          | 238    |                                             |                                                 | (13.7-33.3)             | (93.7-98.3)             | (0.3-17.5)                                  | (0.8-1.1)                                   | (0.3-21.5)                           | (-10.2-19.1)            |
| India (2016) <sup>Rani</sup>                                                                      | Crossed               | 0                           | 32     | 13.1%                                       | 3.7%                                            | 0.0%                    | 86.4%                   | NA                                          | 1.16                                        | NA                                   | -13.6%                  |
|                                                                                                   | Not crossed           | 9                           | 203    |                                             |                                                 | (0-29.9)                | (81.4-90.2)             |                                             | (1.1-1.2)                                   |                                      | (-18.0-(-9.2))          |

NA: not applicable; \* Stillbirths and unknown outcomes excluded from the denominator as follows: Dujardin 1992: outcome unknown for 33 neonates and 28 stillbirths excluded; WHO 1994: 3 stillbirths; \*\*According to data published in full thesis at: <http://www.keneva.net/fmpos/theses/2007/med/pdf/07M235.pdf> and confirmed by the authors; \*\*\*\*Resuscitation definitions vary between studies and results were not pooled.

VanBogaert: Resuscitation determined by an Apgar score at 1 min of less than 7; Rocha: artificial ventilation, heart massage, drug use, timing not specified
