# Supplementary material for: Diagnostic accuracy of the partograph alert and action lines to predict adverse birth outcomes: a systematic review
Source: PubMed Central journal article supplement (PMC6899985; doi:10.1111/1471-0528.15884), 2019-08-18
Supplement: BJO-126-1524-s007.pdf [file BJO-126-1524-s007.pdf]

**Table S6.** Diagnostic test accuracy of the alert line for adverse composite birth outcomes

| Country<br>(Year) reference<br>[Outcome]                                                                                                                         | Alert line<br>status | Adverse<br>Composite Birth<br>Outcome (ABO) |        | Percentage<br>of alert<br>line<br>crossing | Prevalence<br>of ABO | Sensitivity<br>(95% CI) | Specificity<br>(95% CI) | Positive<br>likelihood<br>ratio<br>(95% CI) | Negative<br>likelihood<br>ratio<br>(95% CI) | Diagnostic<br>Odds Ratio<br>(95% CI) | J statistic<br>(95% CI) |
|------------------------------------------------------------------------------------------------------------------------------------------------------------------|----------------------|---------------------------------------------|--------|--------------------------------------------|----------------------|-------------------------|-------------------------|---------------------------------------------|---------------------------------------------|--------------------------------------|-------------------------|
|                                                                                                                                                                  |                      | Present                                     | Absent |                                            |                      |                         |                         |                                             |                                             |                                      |                         |
| Senegal (1992) <sup>Dujardin</sup><br>[fresh stillbirths or<br>neonatal resuscitation at<br>birth]                                                               | Crossed              | 19                                          | 62     |                                            |                      | 28.8%                   | 93.1%                   | 4.18                                        | 0.76                                        | 5.47                                 | 21.9%                   |
|                                                                                                                                                                  | Not crossed          | 47                                          | 839    | 8.4%                                       | 6.8%                 | (19.3-40.6)             | (91.3 -94.6)            | (2.7 -6.6)                                  | (0.7-0.9)                                   | (3.0-9.9)                            | (10.9-33.0)             |
| Indonesia, Malaysia<br>and Thailand<br>(1994) <sup>WHO</sup><br>[fresh stillbirths or Apgar<br>score<8 at one minute<br>among women admitted in<br>active phase] | Crossed              | 209                                         | 1323   |                                            |                      | 54.0%                   | 78.2%                   | 2.47                                        | 0.59                                        | 4.20                                 | 32.2%                   |
|                                                                                                                                                                  | Not crossed          | 178                                         | 4735   | 16.6%                                      | 3.8%                 | (49.0-58.9)             | (77.1-79.2)             | (2.2-2.7)                                   | (0.5-0.7)                                   | (3.4-5.2)                            | (27.1-37.2)             |
| South Africa (2006)<br><sup>Van Bogaert</sup><br>[fresh stillbirths or Apgar<br>score<7 at five minutes]                                                         | Crossed              | 30                                          | 433    |                                            |                      | 61.2%                   | 22.8%                   | 0.79                                        | 1.7                                         | 0.47                                 | -16.0%                  |
|                                                                                                                                                                  | Not crossed          | 19                                          | 128    | 75.9%                                      | 8.0%                 | (47.3-73.6)             | (19.5-26.5)             | (63.2-99.6)                                 | (1.2-2.5)                                   | (0.3-0.9)                            | (-30.0 - (-1.9))        |
| Nigeria (2008) <sup>Orij</sup><br>[fresh stillbirth or birth<br>asphyxia]                                                                                        | Crossed              | 27                                          | 186    |                                            |                      | 51.9%                   | 54.7%                   | 1.15                                        | 0.88                                        | 1.31                                 | 6.7%                    |
|                                                                                                                                                                  | Not crossed          | 25                                          | 225    | 46.0%                                      | 11.2%                | (38.7-64.9)             | (49.9-.59.5)            | (0.9-1.5)                                   | (0.7-1.2)                                   | (0.7-2.3)                            | (-7.7-21.1)             |
| Nigeria and Uganda<br>(2018) <sup>Souza</sup><br>[fresh stillbirth or Apgar<br>Score at 5 min <7 or<br>neonatal resuscitation<br>during hospital stay]           | Crossed              | 152                                         | 4011   |                                            |                      | 59.8%                   | 51.3%                   | 1.23                                        | 0.78                                        | 1.57                                 | 11.1%                   |
|                                                                                                                                                                  | Not crossed          | 102                                         | 4224   | 49.0%                                      | 3.0%                 | (53.7-65.7)             | (50.2-52.4)             | (1.1-1.4)                                   | (0.7-0.9)                                   | (1.2-2.0)                            | (5.0-17.3)              |
| Nigeria and Uganda<br>(2018) <sup>Souza</sup><br>[severe adverse birth<br>outcomes]*                                                                             | Crossed              | 110                                         | 4053   |                                            |                      | 56.7%                   | 51.1%                   | 1.16                                        | 0.85                                        | 1.37                                 | 7.8%                    |
|                                                                                                                                                                  | Not crossed          | 84                                          | 4242   | 49.0%                                      | 2.3%                 | (49.7-63.5)             | (50.1-52.2)             | (1.0-1.3)                                   | (0.7-100)                                   | (1.0-1.8)                            | (0.8-14.9)              |

ABO: Adverse birth outcome; NA: not applicable; \* Severe adverse birth outcomes were defined as the occurrence of any of the following: stillbirths, intra-hospital early neonatal deaths, neonatal use of anticonvulsants, neonatal cardio-pulmonary resuscitation, Apgar score < 6 at 5 minutes, uterine rupture and maternal death or organ dysfunction with dystocia.
