# Supplementary material for: Diagnostic accuracy of the partograph alert and action lines to predict adverse birth outcomes: a systematic review
Source: PubMed Central journal article supplement (PMC6899985; doi:10.1111/1471-0528.15884), 2019-08-18
Supplement: BJO-126-1524-s008.pdf [file BJO-126-1524-s008.pdf]

**Appendix S1.** Search strategies, Date 27 April 2017 (1) and 12 February 2019 (2)

| # | Database : PubMed<br><br>Database Provider : <a href="http://www.pubmed.gov">http://www.pubmed.gov</a><br><br>Date limits : Language limits :<br>Other notes on the search : | Results |
|---|------------------------------------------------------------------------------------------------------------------------------------------------------------------------------|---------|
| 1 | Partograh* OR Partogram*                                                                                                                                                     | 347     |
| 2 |                                                                                                                                                                              | 20      |

| # | Database : EMBASE<br><br>Database Provider : <a href="http://www.embase.com">http://www.embase.com</a><br>Date limits : none<br>Language limits :<br>Other notes on the search : | Results |
|---|----------------------------------------------------------------------------------------------------------------------------------------------------------------------------------|---------|
| 1 | Partograph* OR partogram*                                                                                                                                                        | 473     |
|   |                                                                                                                                                                                  | 43      |

| # | Database : Global Index Medicus (GIM)<br><br>Database Provider : <a href="http://www.globalhealthlibrary.net/">http://www.globalhealthlibrary.net/</a><br><br>Date limits : none<br>Language limits : none<br>Other notes on the search : Filter activated to limit to Regional Databases (AIM, LILACS, IMEMR, IMSEAR & WPRIM) Breakdown<br><ul style="list-style-type: none"> <li>• LILACS (Americas) (60)</li> <li>• IMEMR (Eastern Mediterranean) (18)</li> <li>• IMSEAR (South-EastAsia) (12)</li> <li>• AIM (Africa) (9)</li> <li>• WPRIM (Western Pacific) (8)</li> </ul> | Results |
|---|---------------------------------------------------------------------------------------------------------------------------------------------------------------------------------------------------------------------------------------------------------------------------------------------------------------------------------------------------------------------------------------------------------------------------------------------------------------------------------------------------------------------------------------------------------------------------------|---------|
| 1 | Partograph* OR partogram*                                                                                                                                                                                                                                                                                                                                                                                                                                                                                                                                                       | 107     |
| 2 |                                                                                                                                                                                                                                                                                                                                                                                                                                                                                                                                                                                 | 8       |
| # | Database : Web of Science<br><br>Database Provider : <a href="http://apps.webofknowledge.com/">http:// apps.webofknowledge.com/</a><br><br>Date limits : none<br>Language limits : none                                                                                                                                                                                                                                                                                                                                                                                         | Results |

|   |                             |     |
|---|-----------------------------|-----|
|   | Other notes on the search : |     |
| 1 | Partograph* OR partogram*   | 421 |

|   |                                                                                                                                                                                                |         |
|---|------------------------------------------------------------------------------------------------------------------------------------------------------------------------------------------------|---------|
| # | Database : Popline<br><br>Database Provider : <a href="http://www.popline.org/">http://www.popline.org/</a><br><br>Date limits : none<br>Language limits : none<br>Other notes on the search : | Results |
| 1 | Partograph* OR partogram*                                                                                                                                                                      | 148     |
| 2 |                                                                                                                                                                                                | 17      |

|   |                                                                                                                                                                                                   |         |
|---|---------------------------------------------------------------------------------------------------------------------------------------------------------------------------------------------------|---------|
| # | Database : LILACS<br><br>Database Provider : <a href="http://lilacs.bvsalud.org/">http://lilacs.bvsalud.org/</a><br>Date limits : none<br>Language limits : none<br>Other notes on the search : ) | Results |
| 1 | Partograph* OR partogram* OR partograf*                                                                                                                                                           | 69      |
| 2 |                                                                                                                                                                                                   | 8       |

|   |                                                                                                                                                                                                              |         |
|---|--------------------------------------------------------------------------------------------------------------------------------------------------------------------------------------------------------------|---------|
| # | Database : Central<br><br>Database Provider : <a href="http://www.cochranelibrary.com/">http://www.cochranelibrary.com/</a><br>Date limits : none<br>Language limits : none<br>Other notes on the search : ) | Results |
| 1 | Partograph* OR partogram*                                                                                                                                                                                    | 38      |
| 2 |                                                                                                                                                                                                              | 13      |

|   |                                                                                                                                                       |         |
|---|-------------------------------------------------------------------------------------------------------------------------------------------------------|---------|
| # | Database : WPRIM<br><br>Database Provider : <a href="http://www.wprim.org/">http://www.wprim.org/</a><br>Date limits : none<br>Language limits : none | Results |
|---|-------------------------------------------------------------------------------------------------------------------------------------------------------|---------|

|   |                               |   |
|---|-------------------------------|---|
|   | Other notes on the search : ) |   |
| 1 | Partograph* OR partogram*     | 8 |

|   |                                                                                                                                                                                                                                                                                                                                                                                                                                    |         |
|---|------------------------------------------------------------------------------------------------------------------------------------------------------------------------------------------------------------------------------------------------------------------------------------------------------------------------------------------------------------------------------------------------------------------------------------|---------|
| # | <p>Database : IMEMR</p> <p>Database Provider :<br/> <a href="http://applications.emro.who.int/library/Databases/wxis.exe/Library/Databases/iah/?IshScript=iah/iah.xis&amp;lang=1&amp;base=imemr">http://applications.emro.who.int/library/Databases/wxis.exe/Library/Databases/iah/?IshScript=iah/iah.xis&amp;lang=1&amp;base=imemr</a><br/> Date limits : none<br/> Language limits : none<br/> Other notes on the search : )</p> | Results |
| 1 | Partograph* OR partogram*                                                                                                                                                                                                                                                                                                                                                                                                          | 7       |

|   |                                                                                                                                                                                                                                                                                                                                                                                                                                                                                                                                                                                                                                                                                                                                                                                                                                                                                                                                                                                                                                                                                                                                                  |         |
|---|--------------------------------------------------------------------------------------------------------------------------------------------------------------------------------------------------------------------------------------------------------------------------------------------------------------------------------------------------------------------------------------------------------------------------------------------------------------------------------------------------------------------------------------------------------------------------------------------------------------------------------------------------------------------------------------------------------------------------------------------------------------------------------------------------------------------------------------------------------------------------------------------------------------------------------------------------------------------------------------------------------------------------------------------------------------------------------------------------------------------------------------------------|---------|
| # | <p>Database : Ebsco Multi-Database Search</p> <p>Database Provider : <a href="http://search.ebsco.com">http://search.ebsco.com</a><br/> Date limits : none<br/> Language limits : Medline Citations removed from CINAHL Plus with Full Text and CINAHL Complete</p> <p>Other notes on the search :<br/> Academic Search Premier 134<br/> Academic Search Complete 134<br/> Health Source: Nursing/Academic Edition 41<br/> CINAHL Plus with Full Text 41<br/> CINAHL Complete 41<br/> Women's Studies International 25<br/> Consumer Health Complete – EBSCOhost 20<br/> MasterFILE Premier 12<br/> Gender Studies Database 11<br/> SocINDEX with Full Text 8<br/> Vocational and Career Collection 7<br/> Public Affairs Index 6<br/> Business Source Premier 5<br/> Business Source Complete 5<br/> PsycINFO 4<br/> Psychology and Behavioral Sciences Collection 4<br/> Environment Complete 4<br/> Health Source - Consumer Edition 3<br/> SPORTDiscus with Full Text 3<br/> Food Science Source 3<br/> ERIC 2<br/> Middle Eastern &amp; Central Asian Studies 2<br/> Alt HealthWatch 1<br/> Regional Business News 1<br/> MedicLatina 1</p> | Results |
|---|--------------------------------------------------------------------------------------------------------------------------------------------------------------------------------------------------------------------------------------------------------------------------------------------------------------------------------------------------------------------------------------------------------------------------------------------------------------------------------------------------------------------------------------------------------------------------------------------------------------------------------------------------------------------------------------------------------------------------------------------------------------------------------------------------------------------------------------------------------------------------------------------------------------------------------------------------------------------------------------------------------------------------------------------------------------------------------------------------------------------------------------------------|---------|

|   |                                                                                                                                                                                                          |     |
|---|----------------------------------------------------------------------------------------------------------------------------------------------------------------------------------------------------------|-----|
|   | Agricola 1<br>Legal Collection 1<br>Library, Information Science & Technology Abstracts with Full Text<br>1<br>Education Research Complete 1<br>Risk Management Reference Center 1<br>Caribbean Search 1 |     |
| 1 | Partograph* OR partogram*                                                                                                                                                                                | 189 |
| 2 |                                                                                                                                                                                                          | 61  |

| # | Database : CAJD                                                                                                                                                                                                                                                                                                                         | Results |
|---|-----------------------------------------------------------------------------------------------------------------------------------------------------------------------------------------------------------------------------------------------------------------------------------------------------------------------------------------|---------|
|   | Database Provider : <a href="http://oversea.cnki.net/kns55/brief/result.aspx?dbPrefix=CJFD">http://oversea.cnki.net/kns55/brief/result.aspx?dbPrefix=CJFD</a><br>Date limits : none<br>Language limits : none<br>Other notes on the search : Search limited due to variance in translation of “partograph or partogramme” into Chinese. |         |
| 1 | TI=partogram OR TI='产程图' OR TI=Partograms OR TI=Partographs OR TI=partograph OR KY=partogram OR KY=Partograms OR KY=Partographs OR KY=partograph                                                                                                                                                                                        | 91      |
| 2 |                                                                                                                                                                                                                                                                                                                                         | 1       |

| # | Database : eLibrary.ru                                                                                                                                                                                                                         | Results |
|---|------------------------------------------------------------------------------------------------------------------------------------------------------------------------------------------------------------------------------------------------|---------|
|   | Database Provider : <a href="http://elibrary.ru/defaultx.asp">http://elibrary.ru/defaultx.asp</a><br>Date limits : none<br>Language limits : none<br>Other notes on the search : Not able to import citations into EndNote. Viewed only online |         |
| 1 | Партограмма OR ПАРТОГРАММЫ                                                                                                                                                                                                                     | 73      |

| # | Database : African Index Medicus                                                                                                                                                                                                                   | Results |
|---|----------------------------------------------------------------------------------------------------------------------------------------------------------------------------------------------------------------------------------------------------|---------|
|   | Database Provider : <a href="http://indexmedicus.afro.who.int/">http://indexmedicus.afro.who.int/</a><br>Date limits : none<br>Language limits : none<br>Other notes on the search : Not able to import citations into EndNote. Viewed only online |         |
| 1 | Partograph* partogram*                                                                                                                                                                                                                             | 11      |
| 2 |                                                                                                                                                                                                                                                    | 2       |

| # | Database : IMSEAR<br><br>Database Provider : <a href="http://imsear.li.mahidol.ac.th/">http://imsear.li.mahidol.ac.th/</a><br>Date limits : none<br>Language limits : none<br>Other notes on the search : | Results |
|---|-----------------------------------------------------------------------------------------------------------------------------------------------------------------------------------------------------------|---------|
| 1 | TITLE : Partograph* partogram*                                                                                                                                                                            | 5       |
|   | SUBJECT: Partograph* partogram*                                                                                                                                                                           | 2       |
| 2 |                                                                                                                                                                                                           | 1       |

| # | Database : SCOPUS<br><br>Database Provider : <a href="https://www.scopus.com/home.uri">https://www.scopus.com/home.uri</a><br>Date limits : none<br>Language limits : none<br>Other notes on the search : | Results |
|---|-----------------------------------------------------------------------------------------------------------------------------------------------------------------------------------------------------------|---------|
| 2 | Partograph* partogram*                                                                                                                                                                                    | 68      |
